# Supplementary material
Source: MDPI journal article supplement (https://www.mdpi.com/2311-7524/9/11/1163)
Supplement: s1 [file s1]

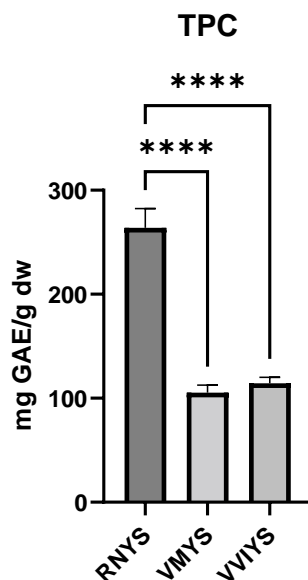

**Figure S1.** Statistical comparison for results of total polyphenolic content (TPC) for optimized young shoots extracts of *Ribes nigrum* (RNYS), *Vaccinium myrtillus* (VMYS), and *Vaccinium vitis-idaea* (VVIYS). All values are expressed as mean  $\pm$  SD (n = 3). Statistical analysis was performed using a one-way ANOVA test, with Tukey's multiple comparisons post-test (\*\*\*\*  $p < 0.0001$ ).

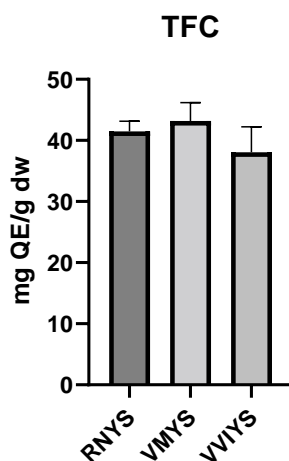

**Figure S2.** Statistical comparison for results of total flavonoid content (TFC) for optimized young shoots extracts of *Ribes nigrum* (RNYS), *Vaccinium myrtillus* (VMYS), and *Vaccinium vitis-idaea* (VVIYS). All values are expressed as mean  $\pm$  SD (n = 3). Statistical analysis was performed using a one-way ANOVA test, with Tukey's multiple comparisons post-test. Statistical significance was considered for  $p < 0.05$ .

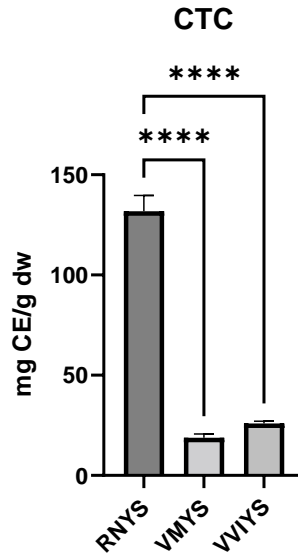

**Figure S3.** Statistical comparison for results of condensed tannin content (CTC) for optimized young shoots extracts of *Ribes nigrum* (RNYS), *Vaccinium myrtillus* (VMYS), and *Vaccinium vitis-idaea* (VVIYS). All values are expressed as mean  $\pm$  SD ( $n = 3$ ). Statistical analysis was performed using a one-way ANOVA test, with Tukey's multiple comparisons post-test (\*\*\*\*  $p < 0.0001$ ).

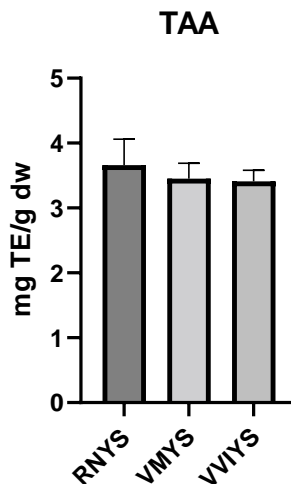

**Figure S4.** Statistical comparison for results of total antioxidant activity evaluated by DPPH assay (TAA) for optimized young shoots extracts of *Ribes nigrum* (RNYS), *Vaccinium myrtillus* (VMYS), and *Vaccinium vitis-idaea* (VVIYS). All values are expressed as mean  $\pm$  SD ( $n = 3$ ). Statistical analysis was performed using a one-way ANOVA test, with Tukey's multiple comparisons post-test. Statistical significance was considered for  $p < 0.05$ .
